# Supplementary material for: Intra- and inter-molecular carboranyl C–H⋯N hydrogen bonds in pyridyl-containing ortho-carboranesElectronic supplementary information (ESI) available: rotatable 3-D molecular structure diagrams of experimental structures of 1–4 and of MP2/6-31G* optimised geometries 1a–7b in CHIME format. Computed GIAO NMR data for 1b–4c. See http://www.rsc.org/suppdata/dt/b2/b209931d/
Source: Royal Society of Chemistry journal article supplement (doi:10.1039/b209931d), 2002-12-24
Supplement: b209931d.doc [file b209931d.doc]

SUPPLEMENTARY MATERIAL

Calculated NMR shifts for minima **1b** to **4c** at the GIAO-B3LYP/6-311G*//MP2/6-31G* level.

**1b**: δ 1H: 8.85 (H6’), 7.72 (H4’), 7.22 (H3’), 7.28 (H5’), 3.62 (C2H), 3.32 (B4,5H), 3.08 (B9H), 2.98 (B12H), 2.92 (B8,10H), 2.89 (B3,6H), 2.75 (B7,11H): δ 11B: -1.7 (B9), -3.0 (B12), -8.6 (B8,10), -11.4 (B4,5), -12.8 (B3,6), -14.3 (B7,11): δ 13C: 163.4 (C2’), 157.3 (C6’), 142.2 (C4’), 128.9 (C5’), 124.9 (C3’), 81.5 (C1), 64.6 (C2).

**2a**: δ 1H: 8.84 (H6’), 7.78 (H4’), 7.27 (H3’), 7.26 (H5’), 4.76 (C2H), 3.69 (CH2), 3.04 (B9H), 2.79 (B12H), 2.74 (B4,5H), 2.64 (B8,10H), 2.62 (B7,11H), 2.30 (B3,6H): δ 11B: -1.0 (B9), -4.6 (B12), -10.8 (B8,10), -12.2 (B4,5), -12.5 (B3,6), -13.4 (B7,11): δ 13C: 167.6 (C2’), 157.7 (C6’), 143.0 (C4’), 129.8 (C3’), 128.1 (C5’), 79.2 (C1), 61.6 (C2), 49.0 (CH2).

**2b**: δ 1H: 8.89 (H6’), 7.73 (H4’), 7.32 (H3’), 7.24 (H5’), 3.62 (CH2), 3.45 (C2H), 3.10 (B3,6H), 2.81 (B12H), 2.79 (B7,11H), 2.75 (B9H), 2.73 (B8,10H), 1.98 (B4,5H): δ 11B: -2.2 (B9), -4.7 (B12), -8.9 (B8,10), -13.0 (B4,5), -13.8 (B3,6), -14.0 (B7,11): δ 13C: 165.7 (C2’), 157.8 (C6’), 142.2 (C4’), 129.7 (C3’), 128.1 (C5’), 79.8 (C1), 68.4 (C2), 51.3 (CH2).

**4a**: δ 1H: 8.92 (H6’), 8.68 (H2’), 7.73 (H4’), 7.24 (H5’), 4.03 (C2H), 3.06 (B9H), 2.99 (B4,5H), 2.98 (B12H), 2.95 (B8,10H), 2.88 (B3,6H), 2.80 (B7,11H): δ 11B: -2.1 (B9), -3.2 (B12), -8.2 (B8,10), -11.9 (B3,6), -12.1 (B4,5), -13.9 (B7,11): δ 13C: 158.3 (C6’), 152.8 (C2’), 141.5 (C4’), 139.4 (C3’), 128.2 (C5’), 79.7 (C1), 62.3 (C2).

**4b**: δ 1H: 9.28 (H2’), 8.97 (H6’), 8.03 (H4’), 7.23 (H5’), 3.35 (C2H, B3,6H), 3.15 (B9H), 2.99 (B12H), 2.91 (B8,10H), 2.81 (B4,5,7,11H): δ 11B: +0.2 (B9), -3.3 (B12), -9.4 (B8,10), -10.6 (B4,5), -13.3 (B7,11), -15.3 (B3,6): δ 13C: 160.5 (C2’), 159.2 (C6’), 144.3 (C4’), 136.9 (C3’), 127.6 (C5’), 82.2 (C1), 69.3 (C2).

**4c**: δ 1H: 9.26 (H2’), 8.94 (H6’), 7.30 (H4’), 7.16 (H5’), 3.82 (C2H), 3.10 (B4,5H), 3.08 (B9H), 2.98 (B12H), 2.97 (B8,10H), 2.81 (B3,6H), 2.77 (B7,11H): δ 11B: -2.0 (B9), -3.2 (B12), -8.1 (B8,10), -11.9 (B3,4,5,6), -14.0 (B7,11): δ 13C: 158.4 (C6’), 157.8 (C2’), 139.0 (C3’), 136.5 (C4’), 127.4 (C5’), 79.6 (C1), 62.6 (C2).
